# Supplementary material for: C-terminal tail insertion of Bcl-xL in membrane occurs via partial unfolding and refolding cycle associating microsolvation
Source: Royal Society of Chemistry journal article supplement (doi:10.1039/c6cp02468h), 2016-01-01
Supplement: c6cp02468h1.pdf [file c6cp02468h1.pdf]

## C-Terminal Tail Insertion of Bcl-x<sub>L</sub> in Membrane Occurs via Partial Unfolding and Refolding Cycle Associating Micro- solvation

Atanu Maity, Souvik Sinha, Debabani Ganguly, Shubhra Ghosh Dastidar

---

### Supporting information

---

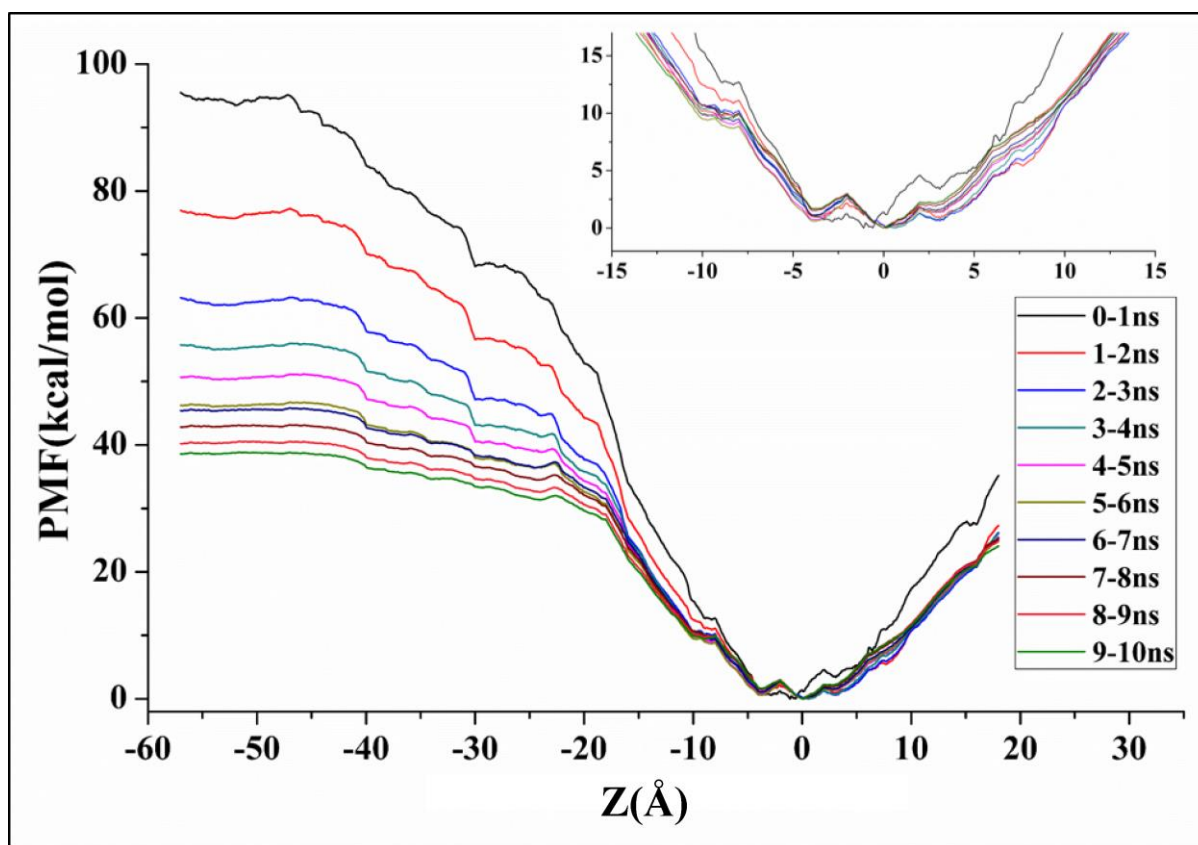

**Figure S1:** PMF profile computed over different windows of simulation, showing a gradual change in the Energy profile leading to convergence. The difference between two consecutive interval decreases gradually. The region near the minima is shown in inset. The horizontal axis Z is same as defined in figure 1.

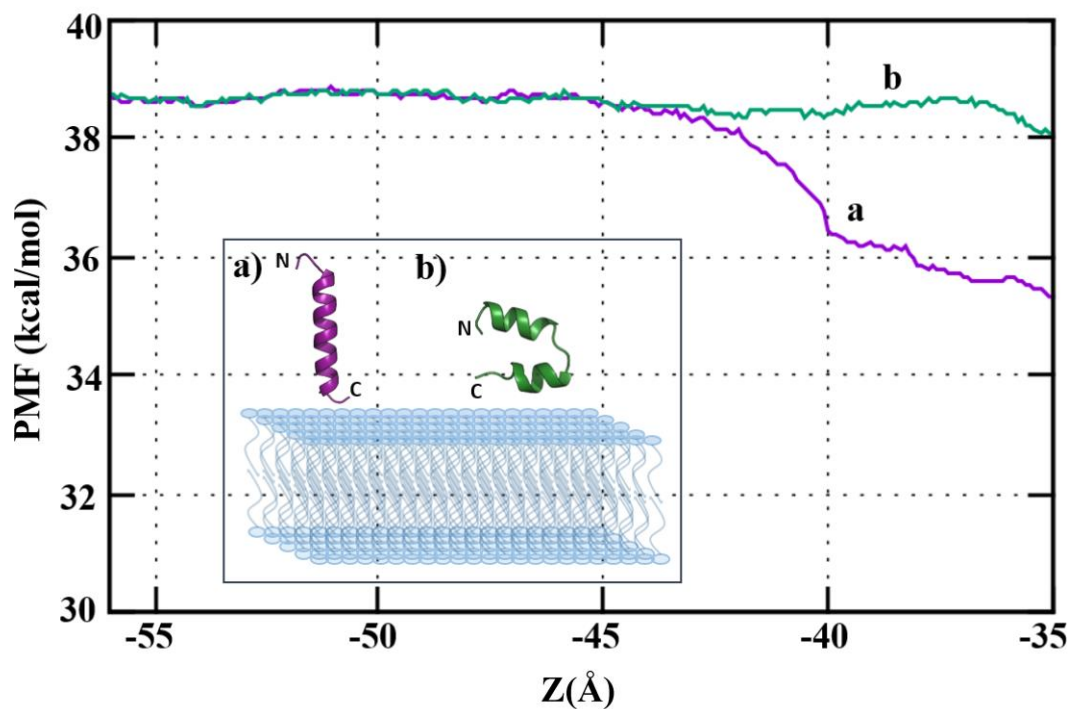

**Figure S2:** Overlay of PMF near the membrane surface, obtained using two different starting conformation a) completely helical and b) partially unfolded.

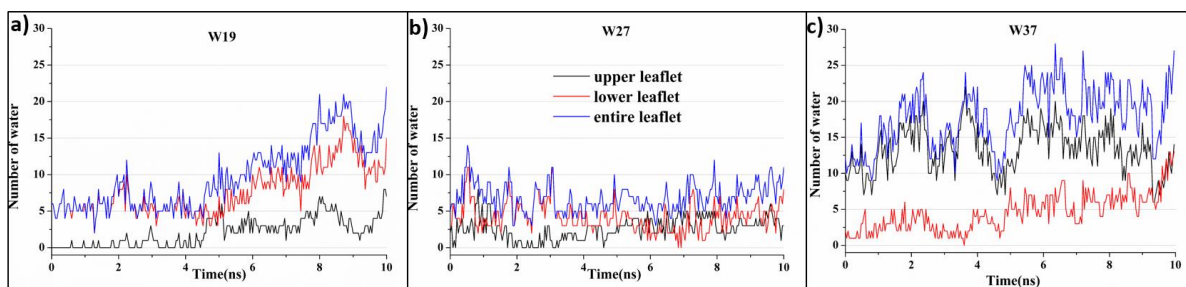

**Figure S3:** Distribution of water within the hydrophobic core of the membrane. Number of water within membrane along the simulation for window a) w19, b) w27 and c) w37 respectively.

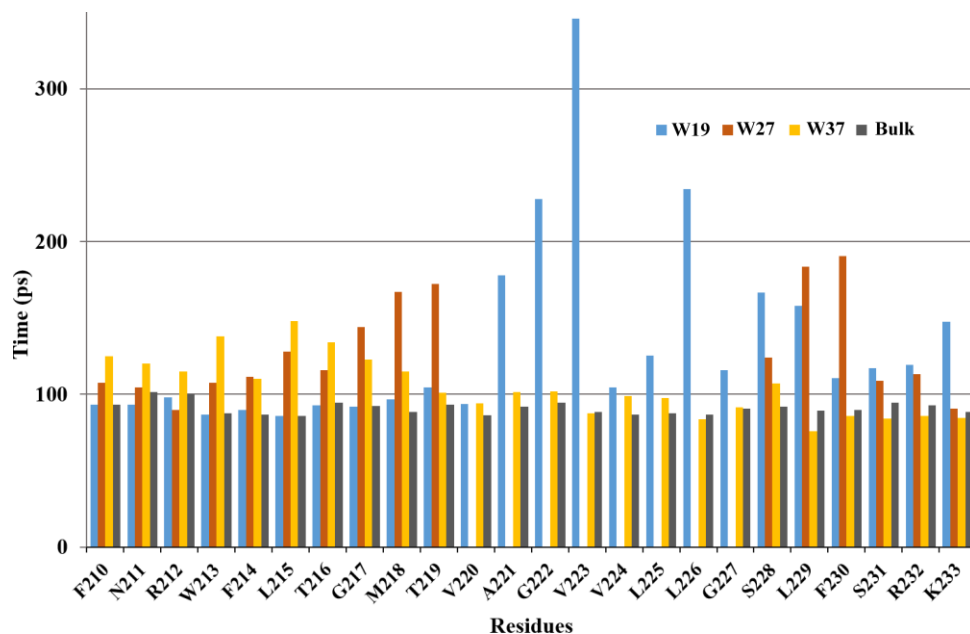

**Figure S4:** Average residence time of water present within a cutoff of 8Å of various amino acid residues inside the membrane. The data has been averaged over the last 5ns of selected windows separately: w19, w27, w37. The ‘bulk’ refers to the water around the peptide in bulk water, i.e. not inside the membrane.

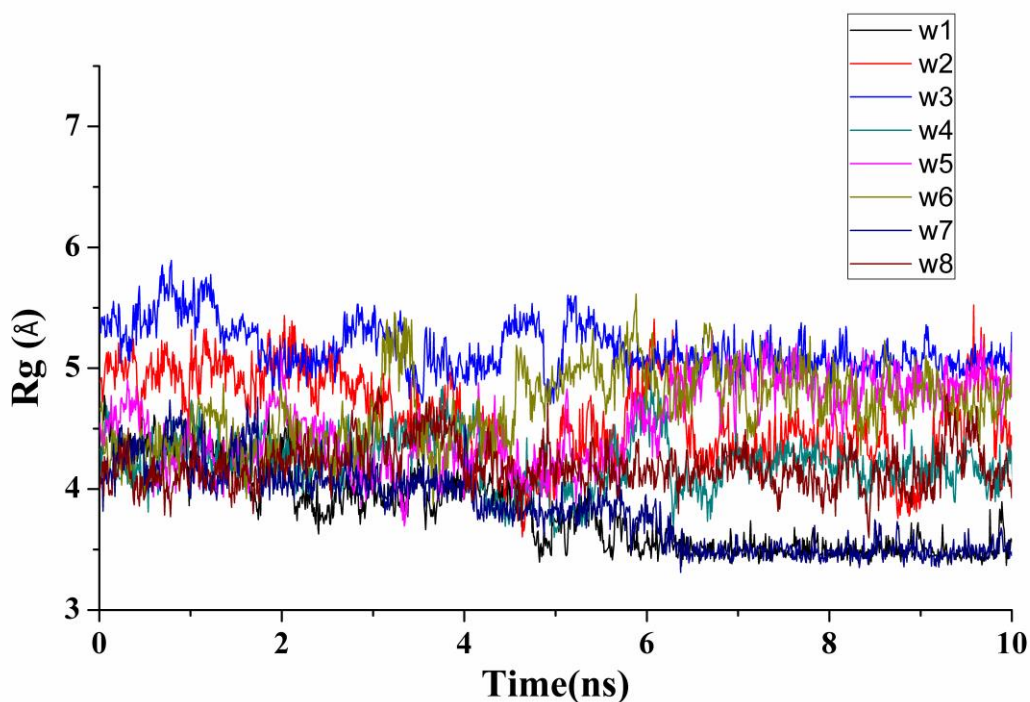

**Figure S5:** Radius of gyration of alpha carbons of C-terminal residues (S228 – K233) of CTPEP along the trajectory in the windows w1 to w8 ( $z = -40$  to  $-56\text{Å}$ ).

**Table S1:** Detail of simulation of the stratified windows. Each of them was set for 5ns of equilibration and 10ns of production.

|    | System identifier | Distance of COM of protein from COM of membrane (Å) |                       |
|----|-------------------|-----------------------------------------------------|-----------------------|
|    |                   | <i>Upper boundary</i>                               | <i>Lower boundary</i> |
| 1  | w1                | -56                                                 | -54                   |
| 2  | w2                | -54                                                 | -52                   |
| 3  | w3                | -52                                                 | -50                   |
| 4  | w4                | -50                                                 | -48                   |
| 5  | w5                | -48                                                 | -46                   |
| 6  | w6                | -46                                                 | -44                   |
| 7  | w7                | -44                                                 | -42                   |
| 8  | w8                | -42                                                 | -40                   |
| 9  | w9                | -40                                                 | -38                   |
| 10 | w10               | -38                                                 | -36                   |
| 11 | w11               | -36                                                 | -34                   |
| 12 | w12               | -34                                                 | -32                   |
| 13 | w13               | -32                                                 | -30                   |
| 14 | w14               | -30                                                 | -28                   |
| 15 | w15               | -28                                                 | -26                   |
| 16 | w16               | -26                                                 | -24                   |
| 17 | w17               | -24                                                 | -22                   |
| 18 | w18               | -22                                                 | -20                   |
| 19 | w19               | -20                                                 | -18                   |
| 20 | w20               | -18                                                 | -16                   |
| 21 | w21               | -16                                                 | -14                   |
| 22 | w22               | -14                                                 | -12                   |
| 23 | w23               | -12                                                 | -10                   |
| 24 | w24               | -10                                                 | -8                    |
| 25 | w25               | -8                                                  | -6                    |
| 26 | w26               | -6                                                  | -4                    |
| 27 | w27               | -4                                                  | -2                    |
| 28 | w28               | -2                                                  | 0                     |
| 29 | w29               | 0                                                   | 2                     |
| 30 | w30               | 2                                                   | 4                     |
| 31 | w31               | 4                                                   | 6                     |
| 32 | w32               | 6                                                   | 8                     |
| 33 | w33               | 8                                                   | 10                    |
| 34 | w34               | 10                                                  | 12                    |
| 35 | w35               | 12                                                  | 14                    |
| 36 | w36               | 14                                                  | 16                    |
| 37 | w37               | 16                                                  | 18                    |

**Table S2:** Detail of simulation of the stratified windows for 2D PMF. The production run was 10 ns for each system

|    | System identifier | Distance of COM of protein from COM of membrane (Å) |                       | Inclination angle ( $\theta$ ) |                       |
|----|-------------------|-----------------------------------------------------|-----------------------|--------------------------------|-----------------------|
|    |                   | <i>Upper boundary</i>                               | <i>Lower boundary</i> | <i>Upper boundary</i>          | <i>Lower boundary</i> |
| 1  | w2d_1             | -56                                                 | -54                   | 180                            | 150                   |
| 2  | w2d_2             | -56                                                 | -54                   | 150                            | 120                   |
| 3  | w2d_3             | -56                                                 | -54                   | 120                            | 90                    |
| 4  | w2d_4             | -54                                                 | -52                   | 180                            | 150                   |
| 5  | w2d_5             | -54                                                 | -52                   | 150                            | 120                   |
| 6  | w2d_6             | -54                                                 | -52                   | 120                            | 90                    |
| 7  | w2d_7             | -52                                                 | -50                   | 180                            | 150                   |
| 8  | w2d_8             | -52                                                 | -50                   | 150                            | 120                   |
| 9  | w2d_9             | -52                                                 | -50                   | 120                            | 90                    |
| 10 | w2d_10            | -50                                                 | -48                   | 180                            | 150                   |
| 11 | w2d_11            | -50                                                 | -48                   | 150                            | 120                   |
| 12 | w2d_12            | -50                                                 | -48                   | 120                            | 90                    |
| 13 | w2d_13            | -48                                                 | -46                   | 180                            | 150                   |
| 14 | w2d_14            | -48                                                 | -46                   | 150                            | 120                   |
| 15 | w2d_15            | -48                                                 | -46                   | 120                            | 90                    |
| 16 | w2d_16            | -46                                                 | -44                   | 180                            | 150                   |
| 17 | w2d_17            | -46                                                 | -44                   | 150                            | 120                   |
| 18 | w2d_18            | -46                                                 | -44                   | 120                            | 90                    |
| 19 | w2d_19            | -44                                                 | -42                   | 180                            | 150                   |
| 20 | w2d_20            | -44                                                 | -42                   | 150                            | 120                   |
| 21 | w2d_21            | -44                                                 | -42                   | 120                            | 90                    |
| 22 | w2d_22            | -42                                                 | -40                   | 180                            | 150                   |
| 23 | w2d_23            | -42                                                 | -40                   | 150                            | 120                   |
| 24 | w2d_24            | -42                                                 | -40                   | 120                            | 90                    |
| 25 | w2d_25            | -40                                                 | -38                   | 180                            | 150                   |
| 26 | w2d_26            | -40                                                 | -38                   | 150                            | 120                   |
| 27 | w2d_27            | -40                                                 | -38                   | 120                            | 90                    |

### Supporting information text:

*Method to compute PMF starting from a partially folded conformation of peptide, as shown in Figure S2:* To consider the possibility of the partially folded conformation as initial structure the completely helical peptide (used in ABF simulations) was solvated in a 64 Å cubic TIP3P waterbox and simulated for 100 ns in NPT condition (Temperature = 300 K, Pressure = 1 atm.) after adequate minimization (ABNR and SD) and equilibration (NVT). From simulation the peptide was found to sample two major conformation, the completely helical (figure S2a) and a helical hairpin (figure S2b). The helical hairpin is found structurally almost similar to that obtained from window w6 after ~8ns of simulation (figure 4b). So as a possibility that partially unfolded structure was used as starting conformation and a PMF was built in the association and absorption regions ( $Z = -34$  to  $-56$  Å). All the conditions for ABF simulation were kept similar except the atoms on which the collective variable was applied. The distance between center of mass of membrane and center of mass of alpha carbons of residues 221 to 225 which is connecting between two helical parts in the hairpin like structure is chosen as collective variable.

*Notes of capping the peptides:* Terminal charges often take part in polar interactions in both the ways: intermolecular and intra-molecular. Thus it can lock the molecule in specific conformations due to over-stabilization of electrostatic interaction. This can slow down the conformational sampling and can introduce artefacts. Even, near the membrane surface, uncapped C-terminal can drastically influence the dynamics of a trans-membrane protein insertion. It is likely that near the negatively charged membrane surface the equilibrium would shift to make the C-terminus neutral to absorb the repulsion. Since no such polarizable force field is available till date to replace the static point charges, the strategic way out is to cap the terminal ends to make them neutral and uniform throughout, which also takes care of the sampling efficiency.
